# Supplementary material
Source: PubMed Central journal article supplement (PMC8748310)
Supplement: NIHMS1755935-supplement-1.pdf [file NIHMS1755935-supplement-1.pdf]

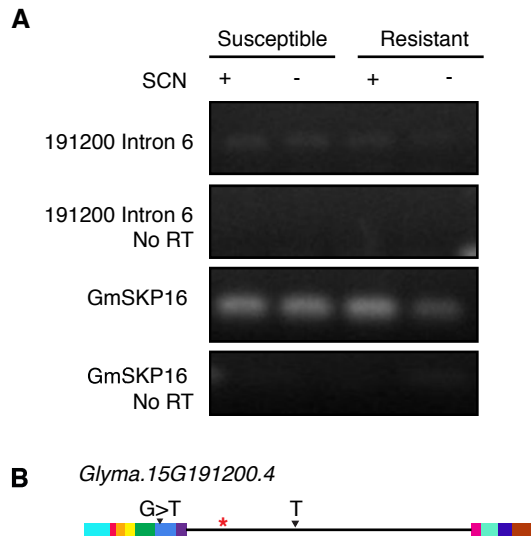

**Supplemental Figure S2. An additional splice from results from intron 6 retention.**

(A) RT-PCR revealed the expression of another alternative splice form, *Glyma.15G191200.4*, which is expressed at a very low level in susceptible (LD10-30080) and resistant (LD10-30110) mock- and SCN-inoculated roots. No RT: cDNA templates made from the same extracted RNA but without reverse transcriptase. (B) A predicted gene model for *Glyma.15G191200.4* with SNPs found in PI 468916. The location of the premature stop codon is indicated with a red asterisk.

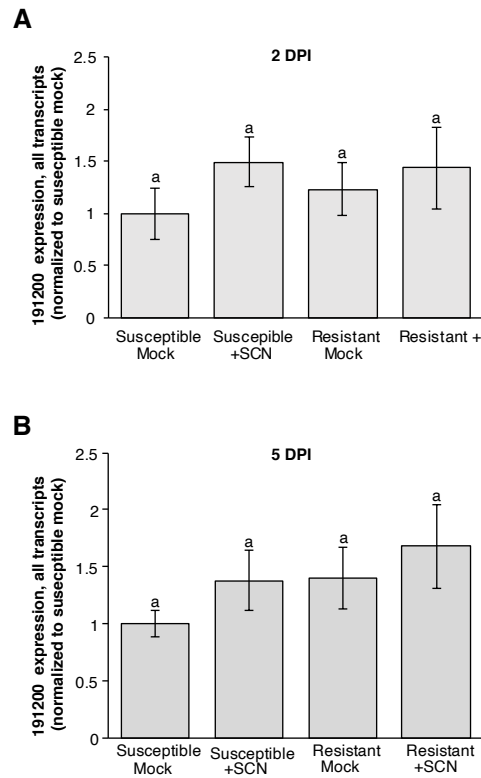

**Supplemental Figure S3. No change detected in overall transcription of *Glyma.15G191200* during SCN infection.** qPCR results of overall transcription of *Glyma.15G191200* at two (A) and five (B) days post inoculation. qPCR amplification was performed with a primer set that amplifies the first and second exon to detect diverse transcripts from *Glyma.15G191200*, including the identified splice forms. Bars represent mean expression relative to *GmSKP16*, normalized to mean for susceptible mock within the same experiment. Error bars are standard error of the mean. Means for treatments labeled with the same letter are not significantly different ( $P > 0.1$ , ANOVA Tukey). Data are for four independent experiments, total n for each treatment was: (A) susceptible mock, 14; susceptible +SCN, 13; resistant mock, 11; resistant +SCN, 15. (B) susceptible mock, 14; susceptible +SCN, 16; resistant mock, 13; resistant +SCN, 15.

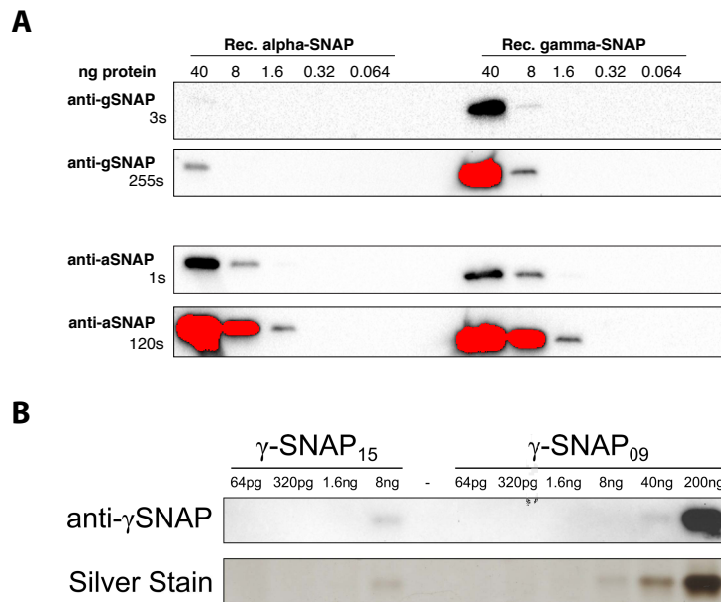

**Supplemental Figure S4. Validation of custom  $\gamma$ -SNAP antibody for specificity for  $\gamma$ -SNAP and not  $\alpha$ -SNAP.** (A) Immunoblots of recombinant (Rec.)  $\gamma$ -SNAP and  $\alpha$ -SNAP protein over a five-fold dilution series. Each band was at the expected size for the respective protein. Red indicates overexposed areas. Exposure time on a high-resolution setting indicated. At extremely high levels,  $\alpha$ -SNAP can be detected by  $\gamma$ -SNAP antibody, but at a lower affinity than for  $\gamma$ -SNAP. In contrast, the  $\alpha$ -SNAP antibody readily detects  $\gamma$ -SNAP with similar affinity. (B) Immunoblots of recombinant protein products of the *cqSCN-006* chromosome 15 locus  $\gamma$ -SNAP and the  $\gamma$ -SNAP encoded on chromosome 9, revealing approximately five-fold greater sensitivity of the polyclonal antibody for the *cqSCN-006*  $\gamma$ -SNAP.

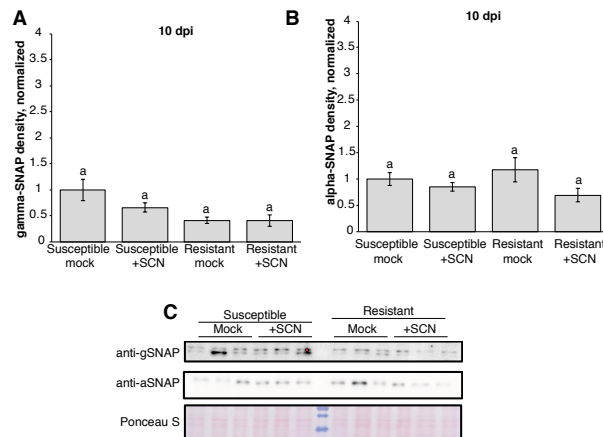

**Supplemental Figure S5.  $\gamma$ -SNAP and  $\alpha$ -SNAP levels diminish 10 days after inoculation.** Densitometry analysis of immunoblot using (A) soybean chromosome 15  $\gamma$ -SNAP or (B) chromosome 18  $\alpha$ -SNAP antibody in susceptible (LD10-30080) and resistant (LD10-30110) mock and SCN inoculated roots 10 dpi. Densitometry analysis data show mean and standard error of four independent experiments each consisting of two or three samples ( $n = 11$ ); data points normalized for susceptible mock within each experiment, data analysis was performed on raw data. Means for treatments with same letter are not statistically different ( $P > 0.05$  ANOVA Tukey test) (C) Representative immunoblots from a single replicate. Images were selected once overexposure of a single band was observed. Ponceau S stains tests equal loading of protein across treatments.

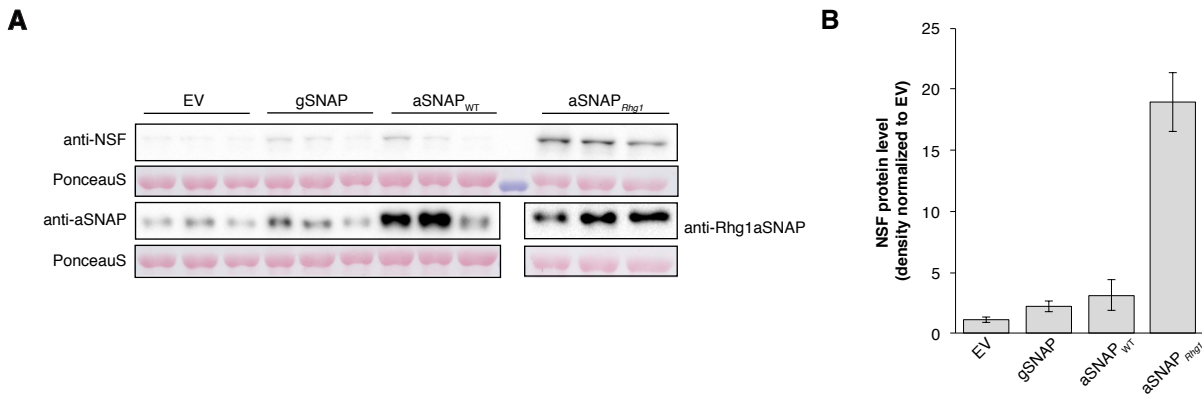

**Supplemental Figure S6. Immunoblots demonstrating previously observed increase in NSF upon ectopic expression of a toxic  $\alpha$ -SNAP in *N. benthamiana* leaves.** (A) immunoblot of protein lysates from *N. benthamiana* leaves expressing  $\gamma$ -SNAP, wild-type  $\alpha$ -SNAP, or Peking-type  $\alpha$ -SNAP<sub>Rhg1</sub> or empty vector (EV). Blots were probed with custom antibodies for NSF and wildtype  $\alpha$ -SNAP, which also detects  $\gamma$ -SNAP, or Peking-type  $\alpha$ -SNAP<sub>Rhg1</sub> as indicated. Ponceau S tests equal loading of samples. (B) Densitometry analysis of representative blot.  $n=3$  for each sample. Data are normalized to EV control.

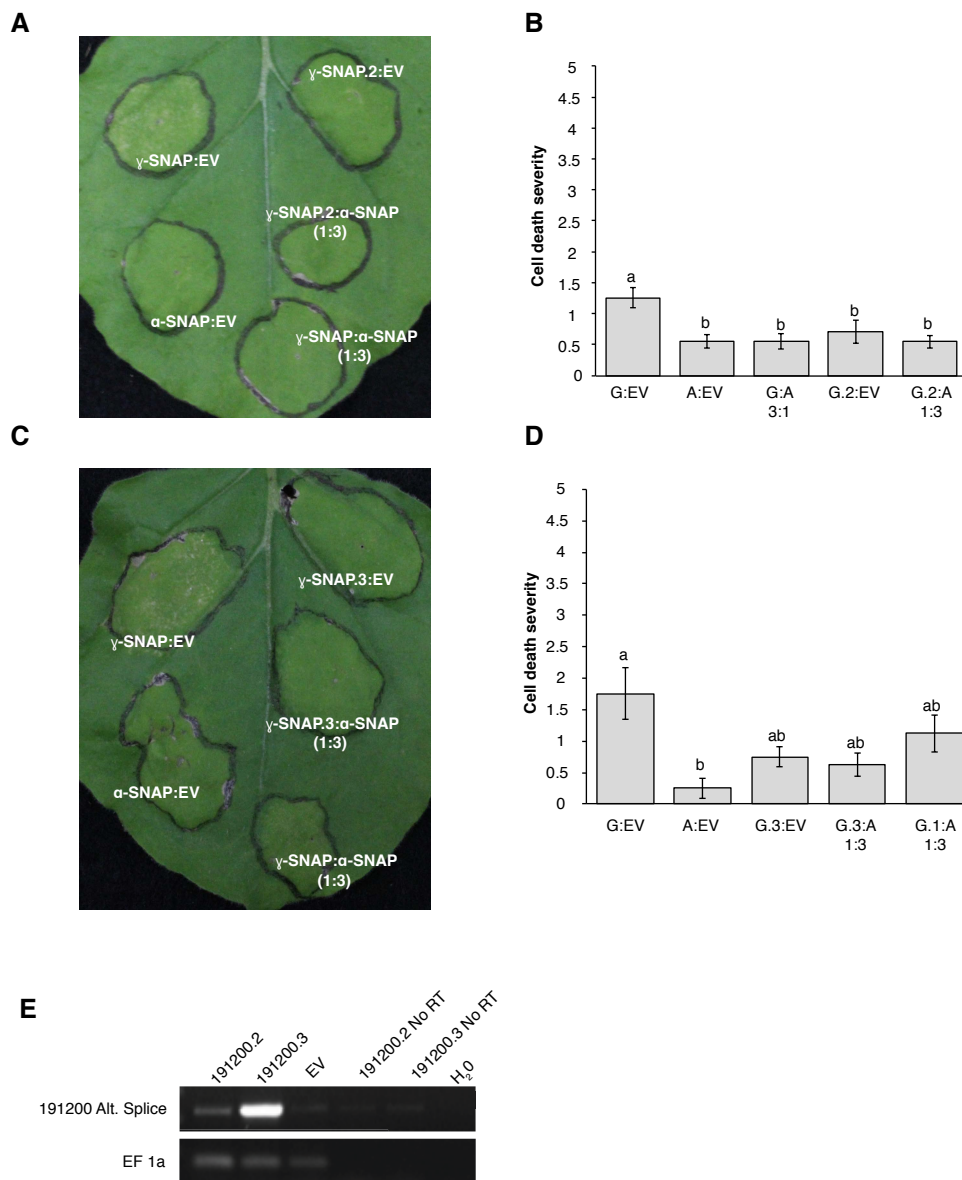

**Supplemental Figure S7.  $\gamma$ -SNAP alternative splice forms do not cause cell death when transiently expressed in *N. benthamiana* leaves.** *N. benthamiana* leaves expressing  $\gamma$ -SNAP alternative splice forms *Glyma.15G191200.2* (A) or *Glyma.15G191200.3* (C) in various ratios with wildtype soybean  $\alpha$ -SNAP and primary transcript *Glyma.15G191200.1* at the indicated ratios. (B, D) Cell death ratings on a 0-5 scales, from multiple independent leaves. Mean treatments with the same letter are not significantly different ( $P < 0.05$ , pairwise Wilcoxon rank sum test). Data shown are mean and standard error of the mean.  $n = 32$  for *Glyma.15G191200.2* and  $n = 8$  for *Glyma.15G191200.3*. G =  $\gamma$ -SNAP, A =  $\alpha$ -SNAP. (E) RT-PCR of cDNA library from infiltrated areas to detect the indicated alternative transcripts. RT-PCR for EF1a performed as a positive control. RT-PCR using water or mock cDNA templates made from the same extracted RNA but with no reverse transcriptase (no RT) performed as negative controls.

1  
2  
3  
4  
5  
6  
7  
8  
9  
10  
11  
12  
13  
14  
15  
16  
17  
18  
19  
20  
21  
22  
23  
24  
25  
26  
27  
28  
29  
30  
31  
32  
33  
34  
35  
36  
37  
38  
39  
40  
41  
42  
43  
44  
45  
46  
47  
48  
49  
50  
51  
52  
53  
54  
55  
56  
57  
58  
59  
60

Day Two - anti-gamma-SNAP - full blot

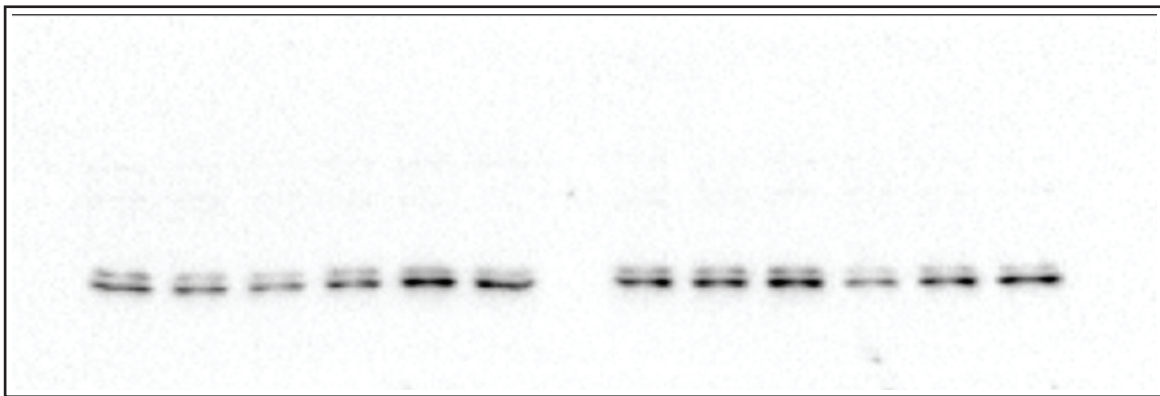

Day Two - anti-alpha-SNAP - full blot

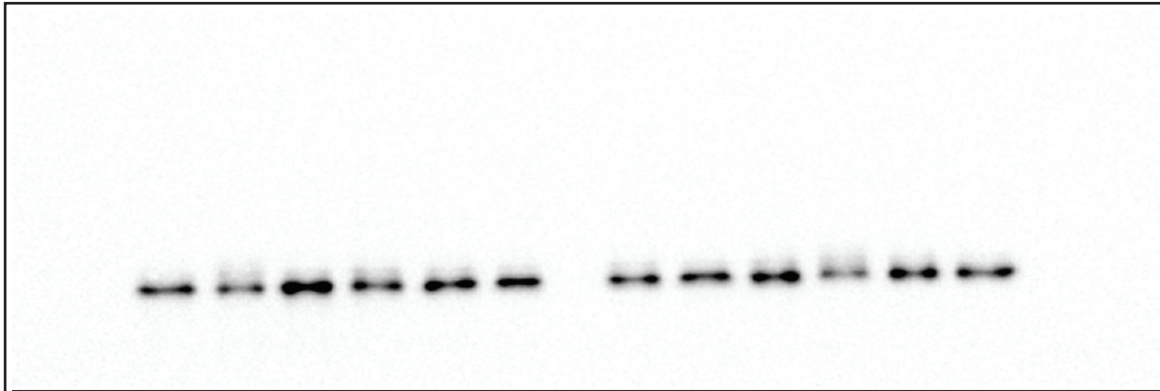

Day Five - anti-gamma-SNAP - full blot

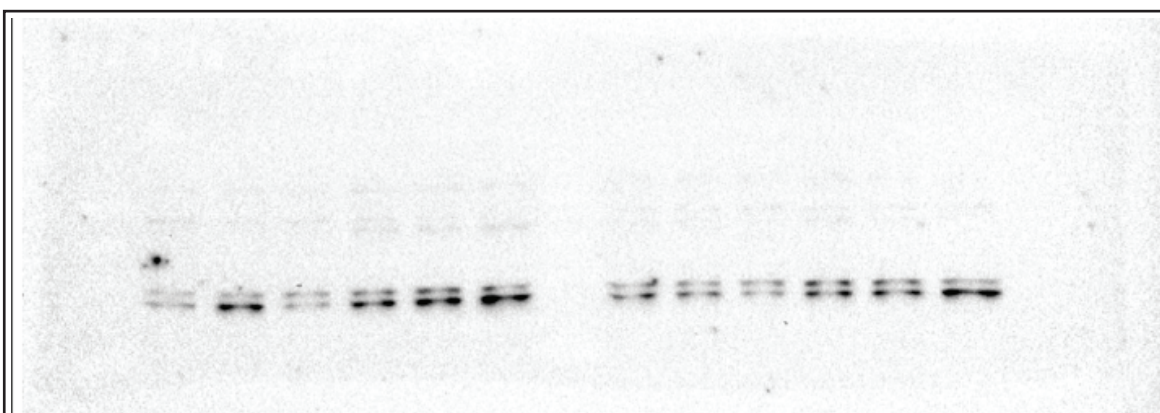

Day Five - anti-alpha-SNAP - full blot

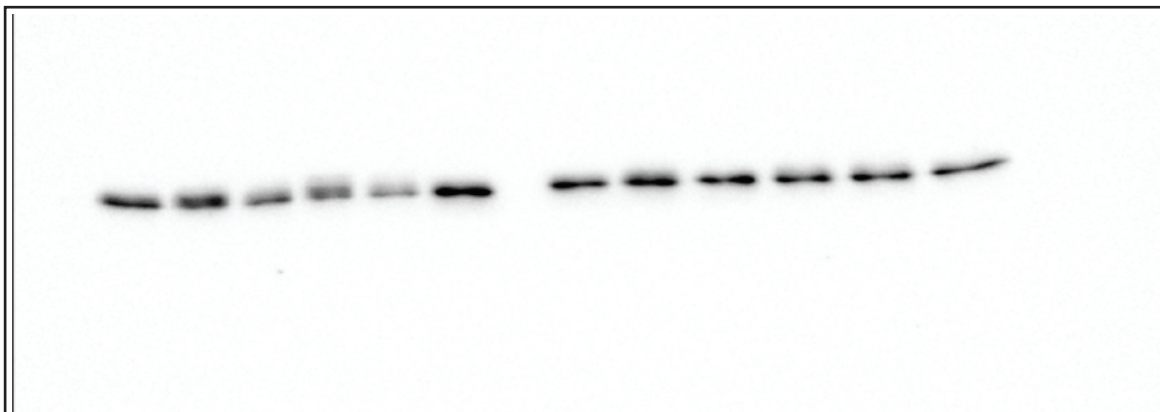

Supplemental Figure S8. Original (uncropped) whole-blot images for Figure 6.



*N. benthamiana* expression - anti-NSF & anti-alphaSNAPWT (a-SNAP exposure time) - full blot

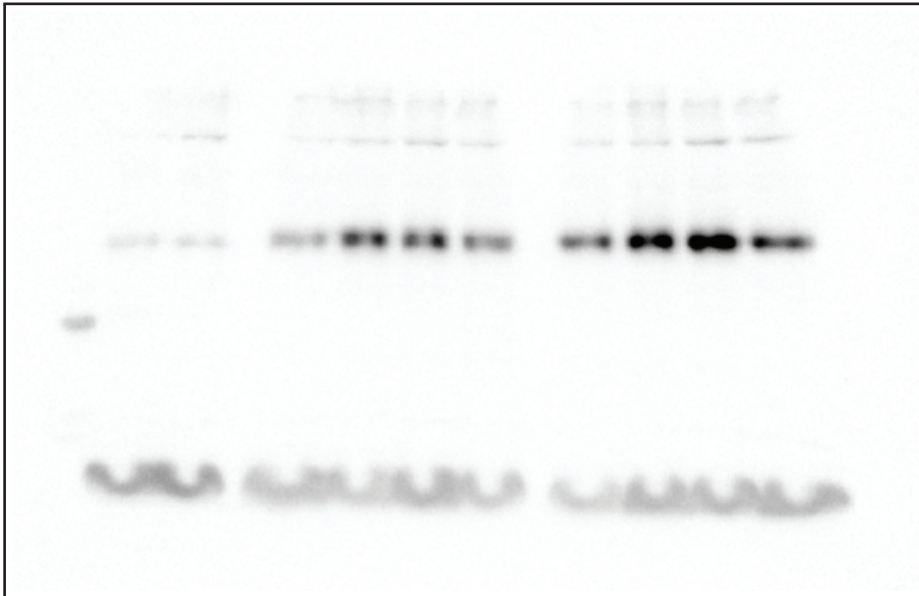

*N. benthamiana* expression - anti-NSF & anti-alphaSNAPWT (NSF exposure time) - full blot

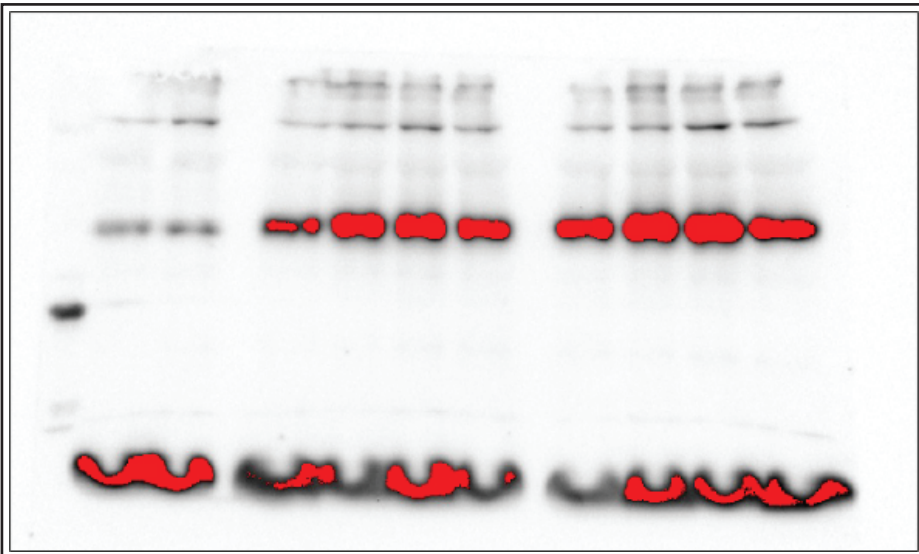

*N. benthamiana* expression - anti-gamma-SNAP - full blot

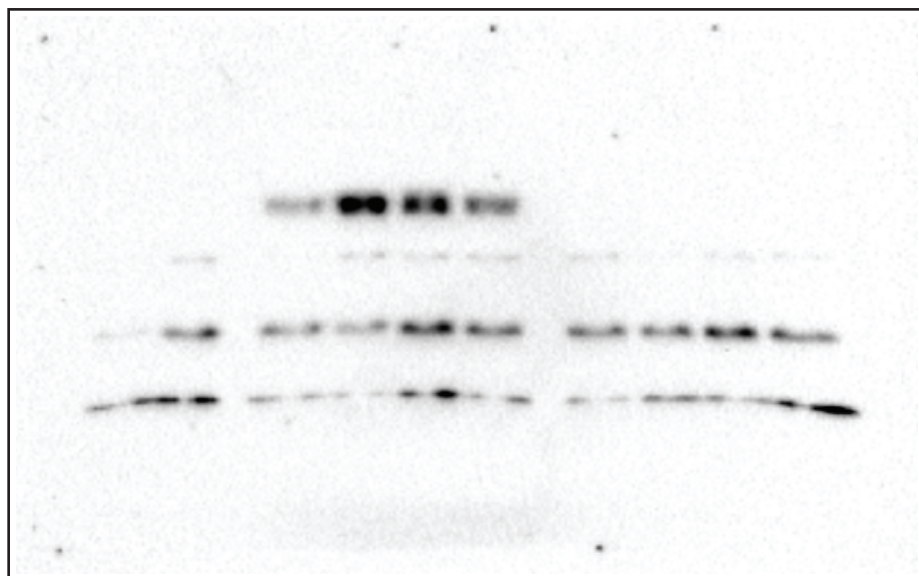

59  
60  
**Supplemental Figure S9. Original (uncropped) whole-blot images for Figure 7.**

**Supplemental Table S1.** Candidate genes fine-mapped to the *cqSCN-006* interval

| <b>Gene name</b>       | <b>Annotated Domain</b>              | <b>General protein function</b>       | <b><i>A. thaliana</i> homolog</b> | <b>Reported Root Expression (FPKM)<sup>1</sup></b> |
|------------------------|--------------------------------------|---------------------------------------|-----------------------------------|----------------------------------------------------|
| <i>Glyma.15G191000</i> | None                                 | None                                  | None                              | 1.297                                              |
| <i>Glyma.15G191100</i> | None                                 | None                                  | None                              | 0.782                                              |
| <i>Glyma.15G191200</i> | Gamma Soluble NSF Attachment Protein | Protein movement, vesicle trafficking | AT4G20410.1                       | 25.555                                             |
| <i>Glyma.15G191300</i> | BED-Finger related                   | DNA Binding                           | AT5G17680.1                       | Not expressed                                      |
| <i>Glyma.15G191400</i> | BED-Finger related                   | DNA Binding                           | AT5G17680.1                       | Not expressed                                      |
| <i>Glyma.15G191500</i> | None                                 | Arabinogalactan                       | AT4G12950.1                       | 1.231                                              |

<sup>1</sup> As reported on Phytozome ([phytozome.jgi.doe.gov](http://phytozome.jgi.doe.gov)), FPKM – Fragments per kilobase of transcript per million mapped reads (Goodstein et al., 2012)

Modified from (Yu & Diers, 2017).

**Supplemental Table S2. DNA sequence analysis for *Glyma.15G191200* across 18 differently soybean lines.**

| Promoter SNPs       |  | -1941                           | -1864 | -1550 | -1513 | -1353 | -1119 | -1064 | -1027 | -1023 | -1005 | -910 | -897 | -851 | -838 | -775 | -766 | -656 | -653 | -541   | -498 | -420 |
|---------------------|--|---------------------------------|-------|-------|-------|-------|-------|-------|-------|-------|-------|------|------|------|------|------|------|------|------|--------|------|------|
| Line/Location       |  | A                               | T     | G     | C     | C     | CGCA  | A     | G     | A     | C     | T    | C    | T    | G    | A    | T    | C    | G    | ATAGGC | G    | G    |
| PI 468916           |  | A                               | T     | G     | C     | C     | CGCA  | A     | G     | A     | C     | T    | C    | T    | G    | A    | T    | C    | G    | ATAGGC | G    | G    |
| LD10-30110          |  | T                               | T     | T     | C     | C     | CGCA  | A     | G     | G     | T     | T    | C    | T    | G    | A    | T    | C    | G    | ATAGGC | G    | A    |
| LD10-30080          |  | T                               | G     | T     | C     | C     | ----  | A     | A     | G     | C     | T    | C    | T    | G    | G    | T    | C    | G    | -----  | G    | G    |
| Williams 82         |  | PI 483463 (G. soja) T A complex |       |       |       |       |       |       |       |       |       |      |      |      |      |      |      |      |      |        |      |      |
| PI 483463 (G. soja) |  | T                               | G     | T     | C     | C     | ----  | A     | A     | G     | C     | T    | C    | T    | G    | G    | T    | C    | G    | -----  | G    | G    |
| Maverick            |  | T                               | G     | T     | C     | C     | ----  | A     | A     | G     | C     | T    | C    | T    | G    | A    | T    | C    | G    | -----  | G    | G    |
| Magellan            |  | T                               | G     | T     | C     | C     | ----  | A     | A     | G     | C     | T    | C    | T    | G    | A    | T    | C    | G    | -----  | G    | G    |
| Peking              |  | T                               | G     | T     | C     | C     | ----  | A     | A     | G     | C     | T    | C    | T    | G    | G    | T    | C    | G    | -----  | G    | G    |
| PI 90763            |  | T                               | G     | T     | T     | T     | ----  | G     | G     | G     | C     | A    | C    | T    | G    | G    | C    | C    | G    | ATAGGC | A    | G    |
| PI 437654           |  | T                               | G     | T     | T     | T     | ----  | G     | G     | G     | C     | A    | A    | T    | G    | A    | C    | C    | G    | -----  | A    | G    |
| PI 209332           |  | T                               | G     | T     | T     | T     | ----  | G     | G     | G     | C     | A    | C    | T    | G    | A    | C    | C    | G    | -----  | A    | G    |
| PI 89772            |  | T                               | G     | T     | T     | T     | ----  | G     | G     | G     | C     | A    | C    | A    | A    | G    | C    | C    | G    | -----  | A    | G    |
| Cloud               |  | T                               | T     | T     | C     | C     | ----  | A     | A     | G     | T     | T    | C    | T    | G    | A    | T    | C    | G    | -----  | G    | A    |
| IA3023              |  | T                               | G     | T     | C     | C     | ----  | A     | A     | G     | C     | T    | C    | T    | G    | G    | T    | C    | G    | -----  | G    | G    |
| LD05-5429           |  | T                               | G     | T     | C     | C     | ----  | A     | A     | G     | C     | T    | C    | T    | G    | G    | T    | C    | G    | -----  | G    | G    |
| LD02-9050           |  | T                               | G     | T     | C     | C     | ----  | A     | A     | G     | C     | T    | C    | T    | G    | G    | T    | C    | G    | -----  | G    | G    |
| LD02-4495           |  | T                               | G     | T     | C     | C     | ----  | A     | A     | G     | C     | T    | C    | T    | G    | G    | T    | C    | G    | -----  | G    | G    |
| LD00-3309           |  | T                               | G     | T     | C     | C     | ----  | A     | A     | G     | C     | T    | C    | T    | G    | G    | T    | C    | G    | -----  | G    | G    |
| CL0J095-4-6         |  | T                               | G     | T     | C     | C     | ----  | A     | A     | G     | C     | T    | C    | T    | G    | G    | T    | C    | G    | -----  | G    | G    |
| 4J105-4-4           |  | T                               | G     | T     | C     | C     | ----  | A     | A     | G     | C     | T    | C    | T    | G    | G    | T    | C    | G    | -----  | G    | G    |

  

| Promoter SNPs       |  | -362 | -344 | -220 | -209 | -193 | -180 | -170 | -153 | -148    | -141    | -136 | -137 | -131 | -124 | -115 | -114 | -106 | -93 | -91 | -55 | -53 |
|---------------------|--|------|------|------|------|------|------|------|------|---------|---------|------|------|------|------|------|------|------|-----|-----|-----|-----|
| Line/Location       |  | G    | G    | C    | C    | G    | T    | C    | A    | G       | A       | C    | C    | T    | C    | G    | C    | G    | T   | -   | A   | A   |
| PI 468916           |  | G    | G    | C    | C    | G    | T    | C    | A    | G       | A       | C    | C    | T    | C    | G    | C    | G    | T   | -   | A   | A   |
| LD10-30110          |  | G    | G    | C    | C    | G    | C    | C    | G    | G       | A       | C    | C    | G    | C    | G    | C    | G    | T   | -   | C   | A   |
| LD10-30080          |  | G    | G    | C    | T    | G    | C    | C    | G    | A       | A       | C    | C    | T    | T    | G    | T    | G    | T   | -   | C   | A   |
| Williams 82         |  | G    | G    | T    | C    | A    | T    | G    | G    | complex | complex | T    | C    | T    | C    | G    | C    | A    | C   | T   | C   | A   |
| PI 483463 (G. soja) |  | G    | G    | C    | T    | G    | C    | C    | G    | A       | A       | C    | C    | T    | C    | G    | T    | G    | T   | -   | C   | A   |
| Maverick            |  | G    | G    | C    | T    | G    | C    | C    | G    | A       | A       | C    | C    | T    | C    | G    | T    | G    | T   | -   | C   | A   |
| Magellan            |  | G    | G    | C    | T    | G    | C    | C    | G    | A       | A       | C    | C    | T    | C    | G    | T    | G    | T   | -   | C   | A   |
| Peking              |  | G    | C    | C    | C    | G    | C    | C    | G    | G       | G       | C    | T    | T    | C    | A    | C    | G    | T   | T   | C   | C   |
| PI 90763            |  | G    | C    | C    | C    | G    | C    | C    | G    | G       | G       | C    | T    | T    | C    | A    | C    | G    | T   | T   | C   | C   |
| PI 437654           |  | G    | C    | C    | C    | G    | C    | C    | G    | G       | G       | C    | T    | T    | C    | A    | C    | G    | T   | T   | C   | C   |
| PI 209332           |  | G    | C    | C    | C    | G    | C    | C    | G    | G       | G       | C    | T    | T    | C    | A    | C    | G    | T   | T   | C   | C   |
| PI 89772            |  | G    | G    | C    | C    | G    | C    | C    | G    | G       | A       | C    | C    | T    | C    | G    | C    | G    | T   | -   | C   | A   |
| Cloud               |  | G    | G    | C    | T    | G    | C    | C    | G    | A       | A       | C    | C    | T    | C    | G    | T    | G    | T   | -   | C   | A   |
| IA3023              |  | G    | G    | C    | T    | G    | C    | C    | G    | A       | A       | C    | C    | T    | C    | G    | T    | G    | T   | -   | C   | A   |
| LD05-5429           |  | G    | G    | C    | T    | G    | C    | C    | G    | A       | A       | C    | C    | T    | C    | G    | T    | G    | T   | -   | C   | A   |
| LD02-9050           |  | G    | G    | C    | T    | G    | C    | C    | G    | A       | A       | C    | C    | T    | C    | G    | T    | G    | T   | -   | C   | A   |
| LD02-4495           |  | G    | G    | C    | T    | G    | C    | C    | G    | A       | A       | C    | C    | T    | C    | G    | T    | G    | T   | -   | C   | A   |
| LD00-3309           |  | G    | G    | C    | T    | G    | C    | C    | G    | A       | A       | C    | C    | T    | C    | G    | T    | G    | T   | -   | C   | A   |
| CL0J095-4-6         |  | G    | G    | C    | T    | G    | C    | C    | G    | A       | A       | C    | C    | T    | C    | G    | T    | G    | T   | -   | C   | A   |
| 4J105-4-4           |  | G    | G    | C    | T    | G    | C    | C    | G    | A       | A       | C    | C    | T    | C    | G    | T    | G    | T   | -   | C   | A   |

  

| Gene body SNPs      |  | 57 | 304 | 315 | 997 | 1429  | 1461 | 1769 | 1787 | 2216 | 2164 | 3521 | 3702 | 3861 | 4256 | 4542 | 4698 | 4710 | 4990 | 5247 | 5304 | 5443 | 6332 | 6886 |
|---------------------|--|----|-----|-----|-----|-------|------|------|------|------|------|------|------|------|------|------|------|------|------|------|------|------|------|------|
| Line/Location       |  | C  | C   | -   | G   | ----  | T    | T    | C    | -    | T    | G    | TT   | G    | T    | C    | T    | G    | ---- | A    | A    | A    | A    | C    |
| PI 468916           |  | C  | C   | -   | G   | ----  | T    | T    | C    | -    | T    | G    | TT   | G    | T    | C    | T    | G    | ---- | A    | A    | A    | A    | C    |
| LD10-30110          |  | C  | C   | -   | G   | ----  | T    | T    | C    | -    | T    | G    | TT   | G    | T    | C    | T    | G    | ---- | A    | A    | A    | A    | C    |
| Williams 82         |  | C  | C   | T   | G   | ----  | T    | A    | C    | -    | G    | G    | TT   | C    | -    | C    | -    | G    | ---- | A    | A    | A    | A    | C    |
| PI 483463 (G. soja) |  | T  | C   | -   | G   | TTGTA | C    | A    | T    | CT   | G    | G    | TT   | C    | -    | T    | T    | A    | GGTC | A    | T    | T    | A    | T    |
| Maverick            |  | C  | C   | T   | G   | ----  | T    | A    | C    | -    | G    | G    | TT   | C    | -    | C    | -    | G    | ---- | A    | A    | A    | A    | C    |
| Magellan            |  | C  | C   | T   | G   | ----  | T    | A    | C    | -    | G    | G    | TT   | C    | -    | C    | -    | G    | ---- | A    | A    | A    | A    | C    |
| Peking              |  | C  | C   | T   | G   | ----  | T    | A    | C    | -    | G    | G    | TT   | C    | -    | C    | -    | G    | ---- | A    | A    | A    | A    | C    |
| PI 90763            |  | C  | -   | -   | A   | ----  | T    | A    | C    | -    | G    | A    | TT   | C    | -    | C    | -    | G    | ---- | T    | A    | A    | T    | C    |
| PI 437654           |  | C  | -   | -   | A   | ----  | T    | A    | C    | -    | G    | A    | TT   | C    | -    | C    | -    | G    | ---- | T    | A    | A    | T    | C    |
| PI 209332           |  | C  | -   | -   | A   | ----  | T    | A    | C    | -    | G    | A    | TT   | C    | -    | C    | -    | G    | ---- | T    | A    | A    | T    | C    |
| PI 89772            |  | C  | -   | -   | A   | ----  | T    | A    | C    | -    | G    | A    | TT   | C    | -    | C    | -    | G    | ---- | T    | A    | A    | T    | C    |
| Cloud               |  | C  | C   | T   | G   | ----  | T    | A    | C    | -    | G    | G    | TT   | C    | -    | C    | -    | G    | ---- | A    | A    | A    | A    | C    |
| IA3023              |  | C  | C   | T   | G   | ----  | T    | A    | C    | -    | G    | G    | TT   | C    | -    | C    | -    | G    | ---- | A    | A    | A    | A    | C    |
| LD05-5429           |  | C  | C   | T   | G   | ----  | T    | A    | C    | -    | G    | G    | TT   | C    | -    | C    | -    | G    | ---- | A    | A    | A    | A    | C    |
| LD02-9050           |  | C  | C   | T   | G   | ----  | T    | A    | C    | -    | G    | G    | TT   | C    | -    | C    | -    | G    | ---- | A    | A    | A    | A    | C    |
| LD02-4495           |  | C  | C   | T   | G   | ----  | T    | A    | C    | -    | G    | G    | TT   | C    | -    | C    | -    | G    | ---- | A    | A    | A    | A    | C    |
| LD00-3309           |  | C  | C   | T   | G   | ----  | T    | A    | C    | -    | G    | G    | TT   | C    | -    | C    | -    | G    | ---- | A    | A    | A    | A    | C    |
| CL0J095-4-6         |  | C  | C   | T   | G   | ----  | T    | A    | C    | -    | G    | G    | TT   | C    | -    | C    | -    | G    | ---- | A    | A    | A    | A    | C    |
| 4J105-4-4           |  | C  | C   | T   | G   | ----  | T    | A    | C    | -    | G    | G    | TT   | C    | -    | C    | A    | G    | ---- | A    | A    | A    | A    | C    |

Location based on TSS (1bp of UTR is 1, first base pair outside is -1)

Complex = complex variation greater than one nucleotide or simple insertion

Unique to 46916

Other Unique SNPs

No Data

**Supplemental Table S3.** Oligonucleotides used in this study.

| <b>Vector Construction</b>                        |                                                                   |
|---------------------------------------------------|-------------------------------------------------------------------|
| MtU6 R                                            | AAGCCTACTGGTTCGCTTGAAG                                            |
| Scaffold F                                        | GTTTTAGAGCTAGAAATAGCAAGTT                                         |
| UNS1_MtU6 F                                       | CATTACTCGCATCCATTCTCATGCCTATCTTATATGATCAATGAGG                    |
| UNS1_Scaffold R                                   | GAGAATGGATGCGAGTAATGAAAAAAGCACCGACTCGGTG                          |
| 35SSpeI_Mtu6 F                                    | CGTGCTCCACCATGTTGGGAATGCCTATCTTATATGATCAATGAGG                    |
| SpeI_Scaffold R                                   | GTCATGAATTGTAATACGACTCAAAAAAAGCACCGACTCGGTG                       |
| 191200 gRNA1                                      | GCTATTTCTAGCTCTAAAACATTAGCTGCAACAGAATACCAAGCCTACTGGTTCCG<br>CTTGA |
| 191200 gRNA2                                      | GCTATTTCTAGCTCTAAAACCTTGGCAGAGCAGCAGCGGACAAGCCTACTGGTTC<br>GCTTGA |
| 191200 Gmubi Gibson F                             | TGTGATTGTTGACTCGACAGATGGCAGCTTCTGATCC                             |
| 191200 Gmubi Gibson R                             | GGTCGAATTCGCCCTTTCAAGTGAGGTCATTTTCATCGA                           |
| <b>RT-PCR and qRT-PCR</b>                         |                                                                   |
| 191200.2/3 RT-PCR F                               | CGAGACCACAACCTGCATCA                                              |
| 191200.2/3 RT-PCR R                               | ACAGCTCAATCACATGCAACA                                             |
| SKP16 qPCR F                                      | GAGCCCAAGACATTGCGAGAG                                             |
| SKP16 qPCR R                                      | CGGAAGCGGAAGAACTGAACC                                             |
| Intron 6 retention F                              | AATGCTACCAATAGCCAGTG                                              |
| Intron 6 retention R                              | AACTACCAACATCAGAGTATTCAC                                          |
| 191200.2/3 qPCR For                               | TCTTTATCGTGCTGCCACTAA                                             |
| 191200.2/3 qPCR Rev                               | CCATCAAATGTATTGCCTCAATT                                           |
| 191200 ALL qPCR For                               | TGCTTTCTTCACCTTGGGATGCG                                           |
| 191200 ALL qPCR Rev                               | TGCCAGTGCTTAGATCCTTTGCG                                           |
| NbEF-1a For                                       | CTTGCTTTCACTCTTGGTGTC                                             |
| NBEF-1a Rev                                       | CAATCATATTGTCTCCCTCGA                                             |
| <b>Glyma.15G191200 Alternative Splice Cloning</b> |                                                                   |
| 191200 5' UTR For                                 | AGGAGGGTGAGTTCTTC                                                 |
| 191200 Splice Intron Rev                          | GTCTACCCTGTGAAAAATCT                                              |
| 191200 SPLICE Intronic For                        | GTGTGAATTCTCAAAGTCTTCA                                            |
| 191200 3' UTR Rev                                 | AACAGCGCTCCTCTTAT                                                 |
